# Supplementary material for: Prediction of lymph node involvement in breast cancer from primary tumor tissue using gene expression profiling and miRNAs
Source: Springer Nature journal article supplement (doi:10.1007/s10549-010-1265-5), 2010-11-29
Supplement: MOESM2 [file 10549_2010_1265_MOESM2_ESM.xls]

## Sheet: Blad1
Supplementary table 2: Active and inactive miRNAs in both subgroups
Active N0	Inactive N0	Active N+	Inactive N+
hsa-let-7b	hsa-miR-1296	hsa-let-7d	hsa-let-7i
hsa-let-7g	hsa-miR-181c	hsa-miR-101	hsa-miR-132
hsa-let-7i	hsa-miR-186	hsa-miR-106b	hsa-miR-143
hsa-miR-100	hsa-miR-197	hsa-miR-141	hsa-miR-145
hsa-miR-103	hsa-miR-205	hsa-miR-142-3p	hsa-miR-146b-5p
hsa-miR-129-5p	hsa-miR-27b	hsa-miR-150	hsa-miR-152
hsa-miR-141	hsa-miR-301a	hsa-miR-18a	hsa-miR-16
hsa-miR-143	hsa-miR-302d	hsa-miR-19b	hsa-miR-195
hsa-miR-15a	hsa-miR-361-5p	hsa-miR-20b	hsa-miR-196a
hsa-miR-15b	hsa-miR-347a	hsa-miR-222	hsa-miR-199a-5p
hsa-miR-16	hsa-miR-450a	hsa-miR-224	hsa-miR-199b-5p
hsa-miR-181a	hsa-miR-518a-3p	hsa-miR-26b	hsa-miR-21
hsa-miR-181b	hsa-miR-532-5p	hsa-miR-296-5p	hsa-miR-26a
hsa-miR-182	hsa-miR-591	hsa-miR-29b	hsa-miR-27a
hsa-miR-18a	hsa-miR-622	hsa-miR-29c	hsa-miR-374a
hsa-miR-191	hsa-miR-767-5p	hsa-miR-30e	hsa-miR-375
hsa-miR-192	hsa-miR-92b	hsa-miR-324-3p	hsa-miR-503
hsa-miR-193b		hsa-miR-342-3p	hsa-miR-519a
hsa-miR-196a		hsa-miR-361-5p	hsa-miR-519b-3p
hsa-miR-19b		hsa-miR-378	hsa-miR-571
hsa-miR-200a		hsa-miR-484	hsa-miR-665
hsa-miR-200c
hsa-miR-203
hsa-miR-20a
hsa-miR-23a
hsa-miR-25
hsa-miR-26a
hsa-miR-26b
hsa-miR-27a
hsa-miR-29a
hsa-miR-29b
hsa-miR-29c
hsa-miR-30a
hsa-miR-30b
hsa-miR-30c
hsa-miR-330-3p
hsa-miR-342-3p
hsa-miR-375
hsa-miR-429
hsa-miR-451
hsa-miR-499-5p
hsa-miR-503
hsa-miR-519a
hsa-miR-519b-3p
hsa-miR-638
hsa-miR-93
hsa-miR-99a
hsa-miR-99b
